# Supplementary material for: Photo-initiated oxidation of C–H bonds by diimine complexes of vanadium(v)
Source: Royal Society of Chemistry journal article supplement (doi:10.1039/d1cc00649e), 2021-01-01
Supplement: d1cc00649e1.pdf [file d1cc00649e1.pdf]

Supporting information for:

## Photo-initiated oxidation of C–H bonds by diimine complexes of vanadium(V)

Rui Zhang and Jeffrey J. Warren

Simon Fraser University, Chemistry, 8888 University Drive, Burnaby, BC V5A 1S6, Canada

### Contents

|                                                                                                                  |    |
|------------------------------------------------------------------------------------------------------------------|----|
| Materials and methods .....                                                                                      | 2  |
| Synthetic scheme for $V^V(O)(O)$ and $V^V(O)(O_2)$ compounds .....                                               | 2  |
| Luminescence spectra for $V^V(O)(O)$ and $V^V(O)(O_2)$ .....                                                     | 3  |
| $^1H$ NMR spectra for DHA and oxidation products .....                                                           | 4  |
| $^1H$ NMR spectra for xanthene and oxidation products .....                                                      | 5  |
| $^1H$ NMR spectra for fluorene and oxidation products .....                                                      | 6  |
| $^1H$ NMR spectra for triphenylmethane ( $Ph_3CH$ ) and oxidation products .....                                 | 7  |
| $^1H$ NMR spectra for toluene and oxidation products .....                                                       | 8  |
| Yields and product distribution for different substrates .....                                                   | 9  |
| X-ray crystallography .....                                                                                      | 9  |
| Crystal structure of compound 1 (9,9',10,10'-tetrahydro-9,9'-bianthracene) .....                                 | 10 |
| Crystal structure of compound 2 (bianthronyl) .....                                                              | 10 |
| Crystal structure of compound 3 (anthraquinone) .....                                                            | 11 |
| $^1H$ NMR spectra for the reaction of toluene with $V^V(O)(O)$ under air and $N_2$ .....                         | 11 |
| $^1H$ NMR spectra for reaction of DHA with $V^V(O)(O)$ under air and $N_2$ .....                                 | 12 |
| Comparison of photochemical oxidations using different ratios of V-complexes and DHA under $N_2$ and $O_2$ ..... | 12 |
| $^{51}V$ NMR spectra for $V^V(O)(O)$ before and after irradiation under $O_2$ , air and $N_2$ .....              | 13 |
| $^{51}V$ NMR spectra for $V^V(O)(O_2)$ before and after photochemical reaction under $O_2$ , air and $N_2$ ..... | 13 |
| $^1H$ NMR spectra for $V^V(O)(O)$ before and after photochemical reaction under $O_2$ , air and $N_2$ .....      | 14 |
| $^1H$ NMR spectra for $V^V(O)(O_2)$ before and after photochemical reaction under $O_2$ , air and $N_2$ .....    | 15 |
| IR spectra for $V^{IV}(O)(OH)$ , $V^V(O)(O)$ and $V^V(O)(O_2)$ .....                                             | 16 |
| IR spectra for $V^V(O)(O)$ before and after photochemical reaction under $O_2$ , air and $N_2$ .....             | 16 |
| IR spectra for $V^V(O)(O_2)$ before and after photochemical reaction under $O_2$ , air and $N_2$ .....           | 17 |
| UV-vis spectra for $V^{IV}(O)(OH)$ , $V^V(O)(O)$ and $V^V(O)(O_2)$ .....                                         | 17 |
| UV-vis spectra for $V^V(O)(O)$ before and after photochemical reaction under $O_2$ , air and $N_2$ .....         | 18 |
| UV-vis spectra for $V^V(O)(O_2)$ before and after photochemical reaction under $O_2$ , air and $N_2$ .....       | 18 |
| Computational Details .....                                                                                      | 19 |
| References .....                                                                                                 | 21 |

## Materials and methods

All chemicals were purchased from Sigma-Aldrich and were used as received, unless noted otherwise. Solvents were from J.T. Baker. Gases were got from Praxair Canada. All vanadium complexes were prepared (see below) and characterized following literature procedures.<sup>1,2</sup> Nuclear magnetic resonance (NMR) was carried out using the Bruker Ultrashield™ 400 plus. The photochemical character was studied using Spectrofluorometer FS5 (Edinburgh Instruments Ltd). UV-visible (UV-vis) spectra were collected using a Cary100Bio UV-vis spectrophotometer. FT-IR was tested using NEXUS 670 FT-IR of Thermo Instruments (Canada) Inc.

## Synthetic scheme for $V^V(O)(O)$ and $V^V(O)(O_2)$ compounds

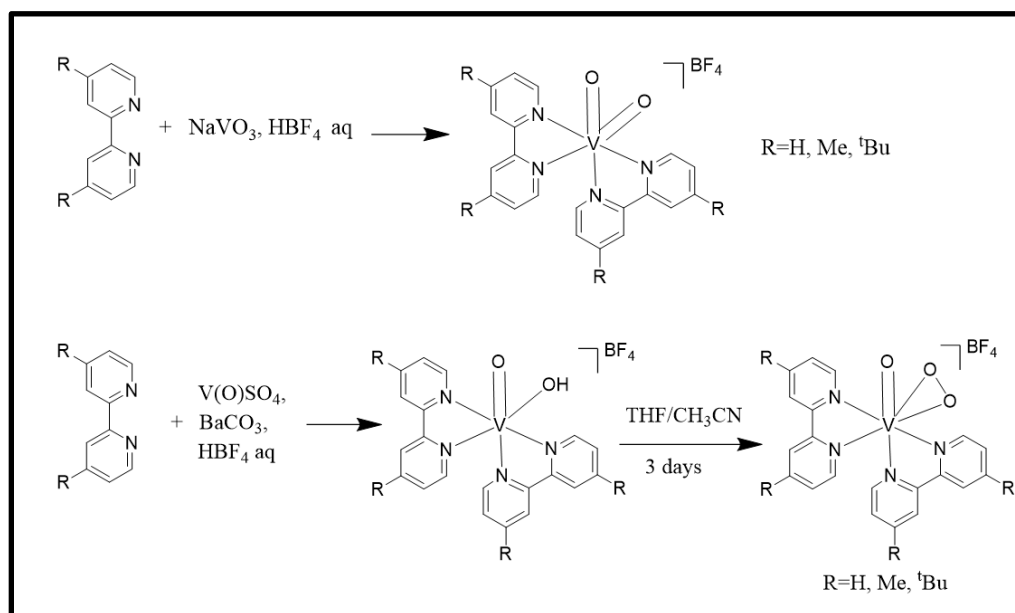

**Figure S1.** The syntheses of  $V^V(O)(O)$  and  $V^V(O)(O_2)$  compounds.

**Luminescence spectra for  $V^V(O)(O)$  and  $V^V(O)(O_2)$** 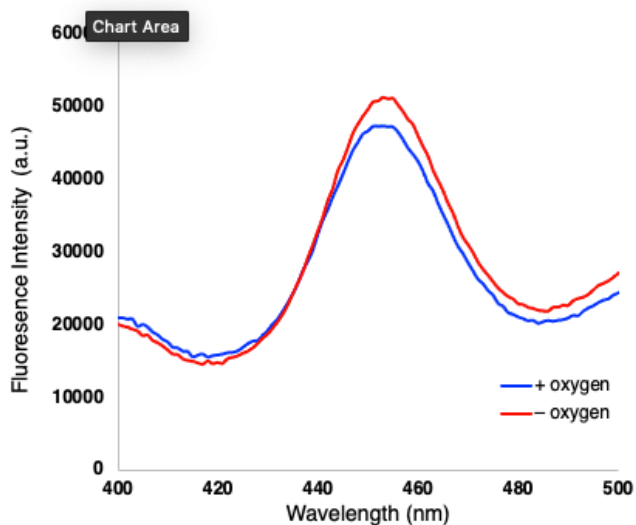

**Figure S3.** Photoluminescence spectra for  $V^V(O)(O)$  in the presence (blue trace) and absence (red trace) of  $O_2$ .

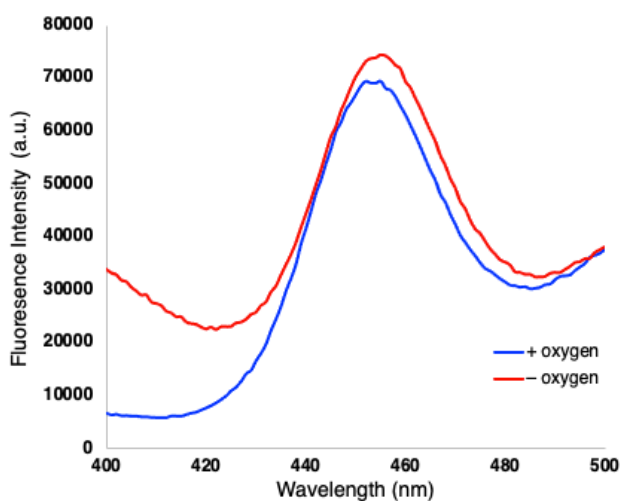

**Figure S3.** Photoluminescence spectra for  $V^V(O)(O_2)$  in the presence (blue trace) and absence (red trace) of  $O_2$ .

**$^1\text{H}$  NMR spectra for DHA and oxidation products**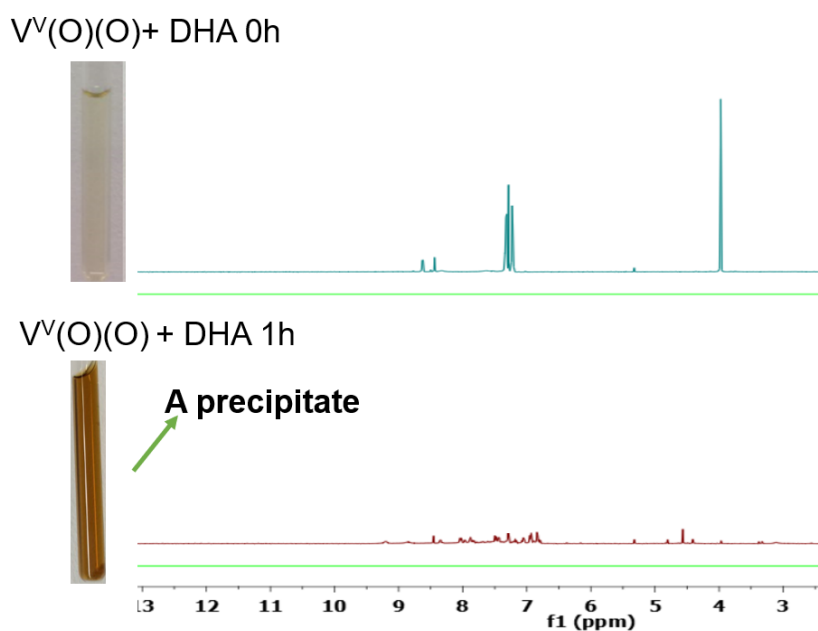

**Figure S4.** Before and after 60 min irradiation  $^1\text{H}$  NMR spectra for a solution of DHA and  $\text{V}^{\text{V}}(\text{O})(\text{O})$  in  $\text{CD}_3\text{CN}$  (green was before reaction and red was after reaction). Images of the NMR tubes before and after reactions are shown at left.

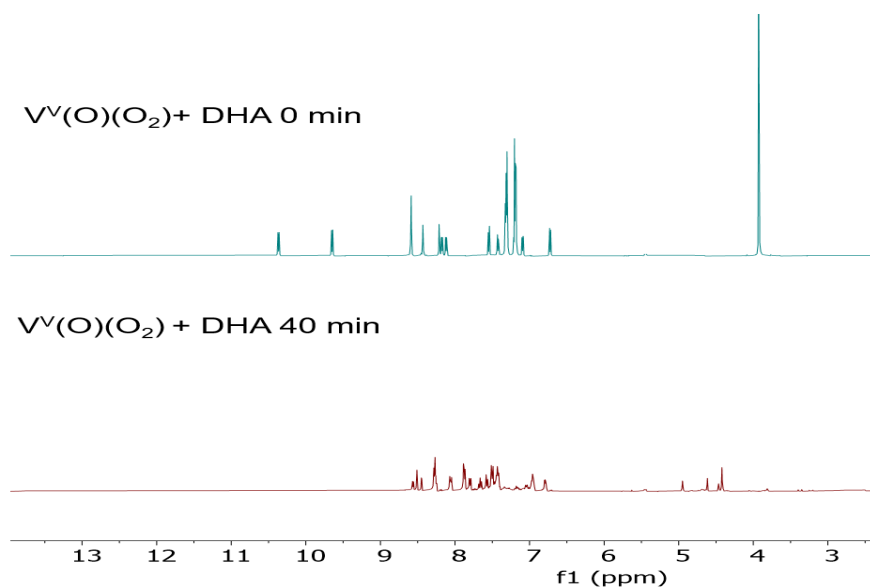

**Figure S5.** Before and after 40 min irradiation  $^1\text{H}$  NMR spectra for a solution of DHA and  $\text{V}^{\text{V}}(\text{O})(\text{O}_2)$  in  $\text{CD}_3\text{CN}$  (green was before reaction and red was after reaction).

**$^1\text{H}$  NMR spectra for xanthene and oxidation products**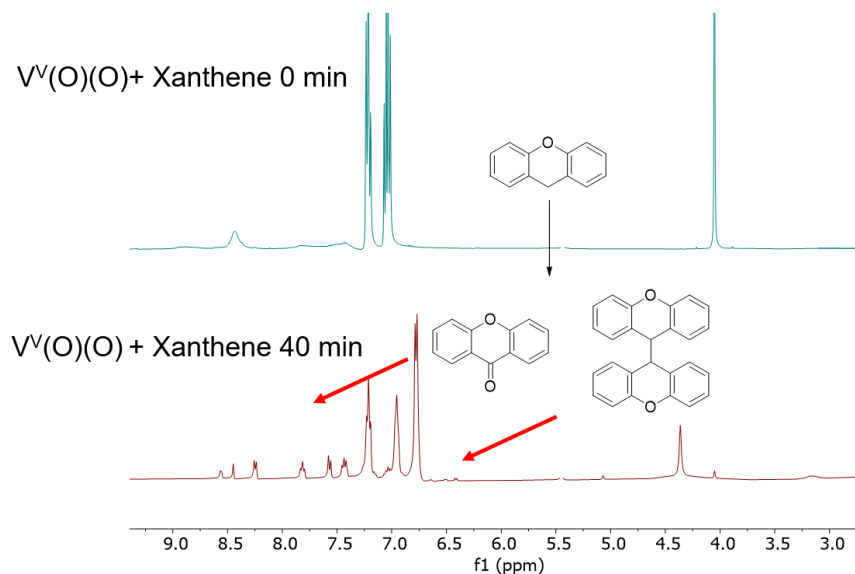

**Figure S6.** Before and after 40 min irradiation  $^1\text{H}$  NMR spectra for a solution of xanthene  $\text{V}^{\text{V}}(\text{O})(\text{O})$  in  $\text{CD}_3\text{CN}$  (green was before reaction and red was after reaction).

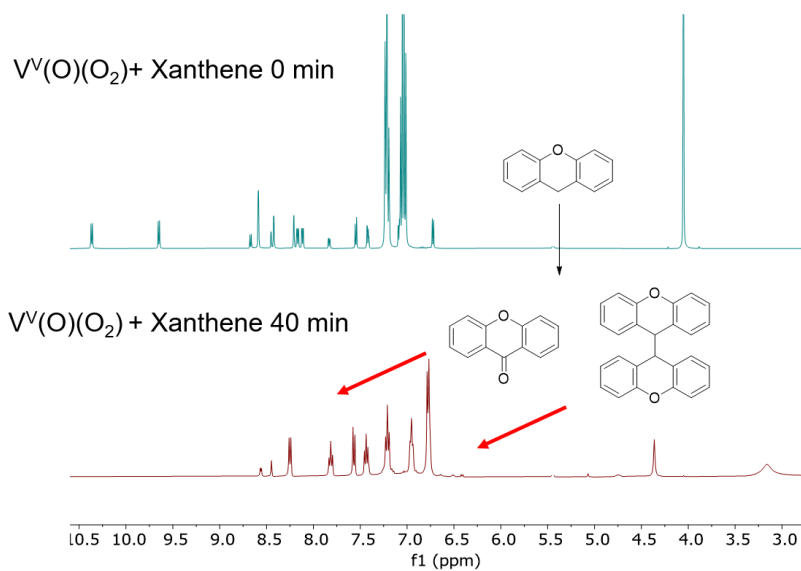

**Figure S7.** Before and after 40 min irradiation  $^1\text{H}$  NMR spectra for a solution of xanthene and  $\text{V}^{\text{V}}(\text{O})(\text{O}_2)$  in  $\text{CD}_3\text{CN}$  (green was before reaction and red was after reaction).

**$^1\text{H}$  NMR spectra for fluorene and oxidation products**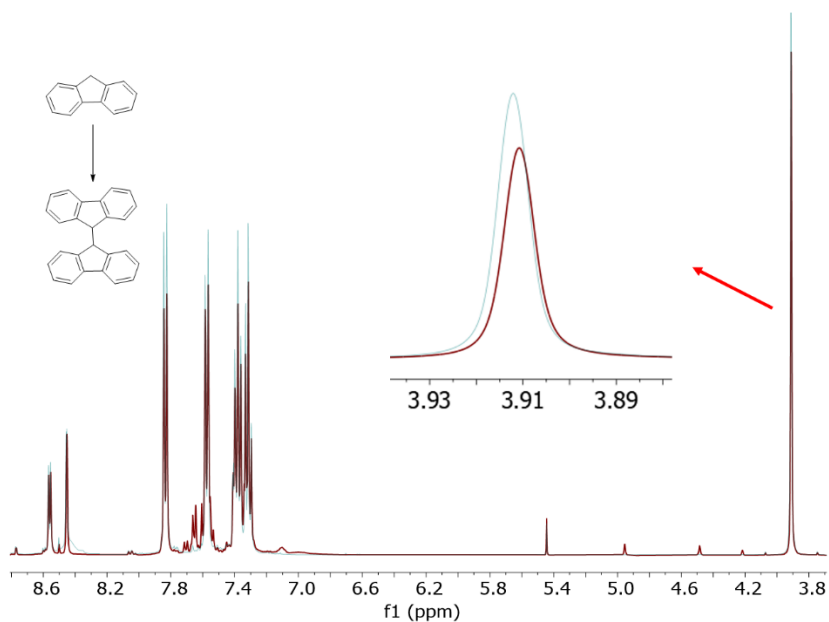

**Figure S8.** Before and after 240 min irradiation  $^1\text{H}$  NMR spectra for a solution of fluorene and  $\text{V}^{\text{V}}(\text{O})(\text{O})$  in  $\text{CD}_3\text{CN}$  (green was before reaction and red was after reaction).

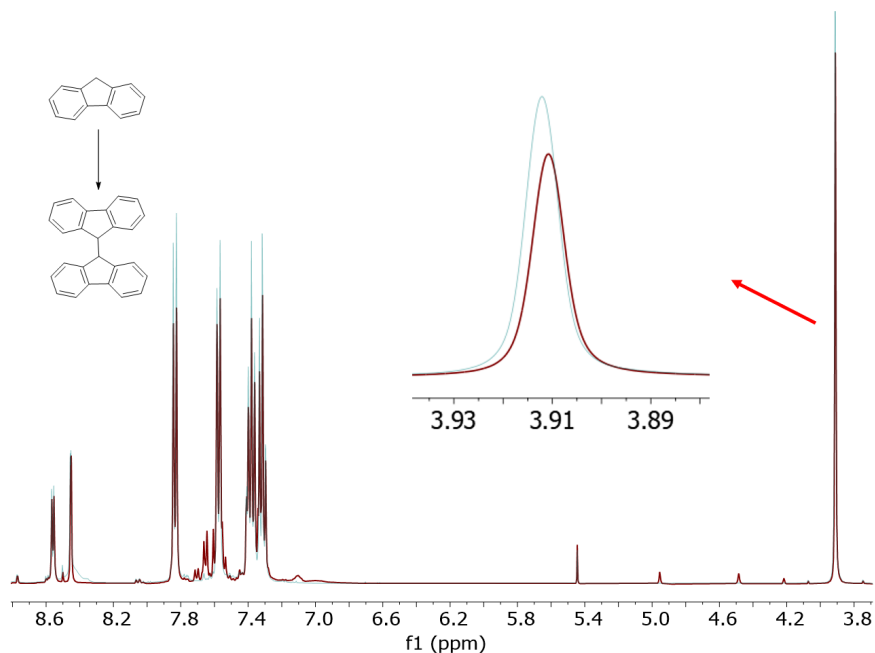

**Figure S9.** Before and after 240 min irradiation  $^1\text{H}$  NMR spectra for a solution of fluorene and  $\text{V}^{\text{V}}(\text{O})(\text{O}_2)$  in  $\text{CD}_3\text{CN}$  (green was before reaction and red was after reaction).

**$^1\text{H}$  NMR spectra for triphenylmethane ( $\text{Ph}_3\text{CH}$ ) and oxidation products**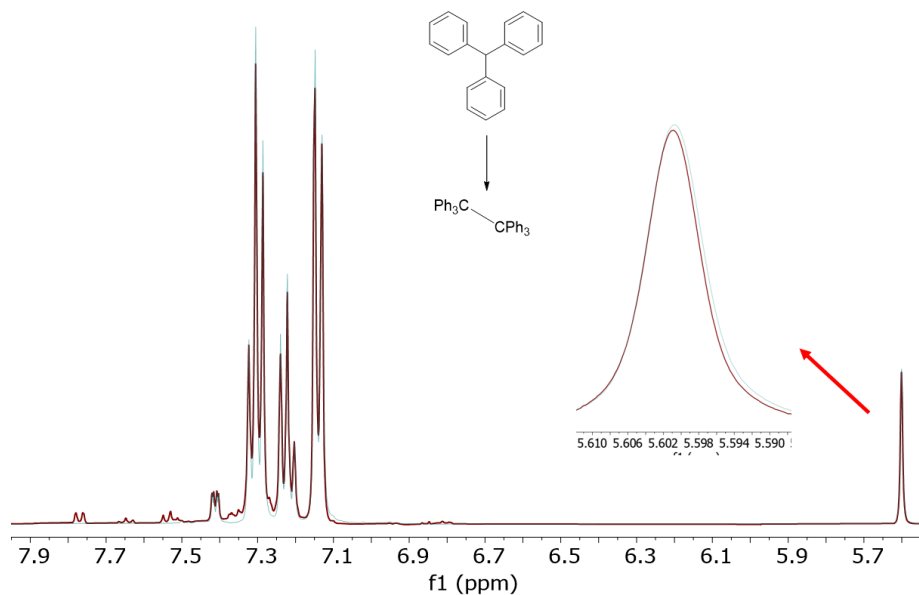

**Figure S10.** Before and after 360 min irradiation  $^1\text{H}$  NMR spectra for a solution of  $\text{Ph}_3\text{CH}$  and  $\text{V}^{\text{V}}(\text{O})(\text{O})$  in  $\text{CD}_3\text{CN}$  (green was before reaction and red was after reaction).

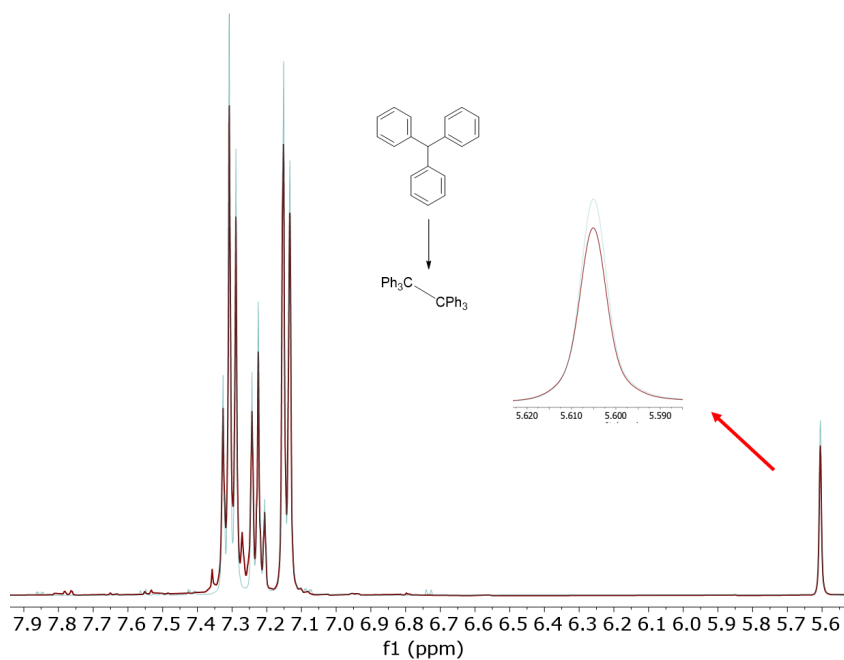

**Figure S11.** Before and after 360 min irradiation  $^1\text{H}$  NMR spectra for a solution of  $\text{Ph}_3\text{CH}$  and  $\text{V}^{\text{V}}(\text{O})(\text{O}_2)$  in  $\text{CD}_3\text{CN}$  (green was before reaction and red was after reaction).

**$^1\text{H}$  NMR spectra for toluene and oxidation products**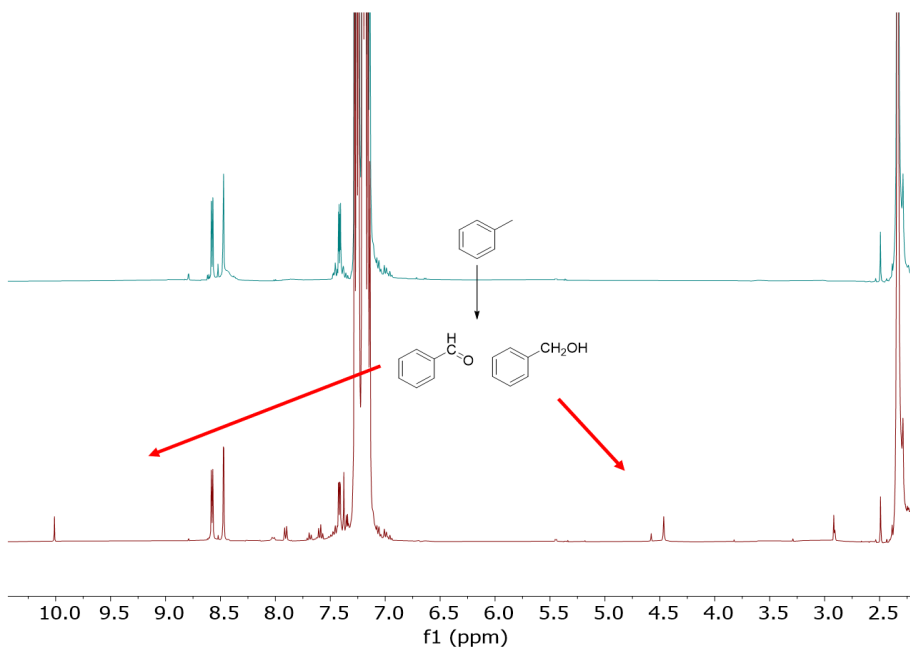

**Figure S12.** Before and after 540 min irradiation  $^1\text{H}$  NMR spectra for a solution of toluene and  $\text{V}^{\text{V}}(\text{O})(\text{O})$  in  $\text{CD}_3\text{CN}$  (green was before reaction and red was after reaction).

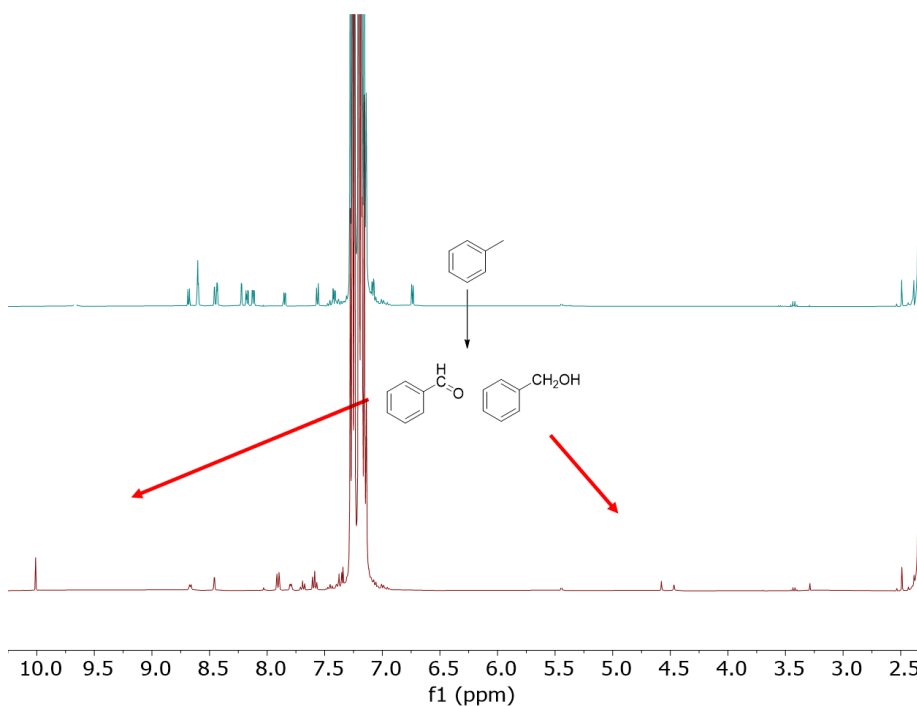

**Figure S13.** Before and after 540 min irradiation  $^1\text{H}$  NMR spectra for a solution of toluene and  $\text{V}^{\text{V}}(\text{O})(\text{O}_2)$  in  $\text{CD}_3\text{CN}$  (green was before reaction and red was after reaction).



## Yields and product distribution for different substrates

**Table S1.** Yields and product distribution for different substrates using V(O)(O) or V(O)(O<sub>2</sub>) calculated from <sup>1</sup>H NMR integration.

| Substrates                | Product       | Relative Yield w/<br>V(O)(O) (%) | Relative Yield w/<br>V(O)(O <sub>2</sub> ) (%) |
|---------------------------|---------------|----------------------------------|------------------------------------------------|
| Xanthene                  | dixanthene    | 94                               | 88                                             |
|                           | xanthone      | 6                                | 12                                             |
| 9,10<br>dihydroanthracene | bianthracene  | 88                               | 76                                             |
|                           | bianthronyl   | 6                                | 11                                             |
|                           | anthraquinone | 6                                | 14                                             |
| fluorene                  | dimer         | 100                              | 100                                            |
| triphenylmethane          | dimer         | 100                              | 100                                            |
| toluene                   | phenylethanol | 71                               | 29                                             |
|                           | benzaldehyde  | 34                               | 67                                             |

## X-ray crystallography

Crystals were coated in paratone oil, mounted on a MiTeGen Micro Mount. Data were collected on a Bruker Smart instrument equipped with an APEX II CCD area detector fixed at a distance of 5.0 cm from the crystal and a Cu K $\alpha$  fine focus sealed tube ( $\lambda = 1.54178$  nm) operated at 1.5 kW (50 kV, 30 mA), filtered with a graphite monochromator. All diffraction data were processed with the Bruker Apex II software suite. Selected data are shown in Table S2.

| Identification code   | 1                               | 2                                                 | 3                               |
|-----------------------|---------------------------------|---------------------------------------------------|---------------------------------|
| Empirical formula     | C <sub>28</sub> H <sub>22</sub> | C <sub>28</sub> H <sub>22</sub> O <sub>0.25</sub> | C <sub>7</sub> H <sub>4</sub> O |
| Formula weight        | 358.45                          | 362.45                                            | 104.10                          |
| Temperature/K         | 296(2)                          | 296(2)                                            | 296(2)                          |
| Crystal system        | monoclinic                      | monoclinic                                        | monoclinic                      |
| Space group           | P2 <sub>1</sub> /n              | C2/c                                              | P2 <sub>1</sub> /c              |
| a/Å                   | 12.5501(12)                     | 22.3284(6)                                        | 7.8768(2)                       |
| b/Å                   | 5.8657(6)                       | 7.7485(2)                                         | 3.97070(10)                     |
| c/Å                   | 12.8898(13)                     | 13.6688(3)                                        | 15.8098(3)                      |
| $\alpha$ /°           | 90                              | 90                                                | 90                              |
| $\beta$ /°            | 95.234(6)                       | 126.7290(10)                                      | 102.6710(10)                    |
| $\gamma$ /°           | 90                              | 90                                                | 90                              |
| Volume/Å <sup>3</sup> | 944.93(16)                      | 1895.37(8)                                        | 482.43(2)                       |

**Crystal structure of compound 1 (9,9',10,10'-tetrahydro-9,9'-bianthracene)**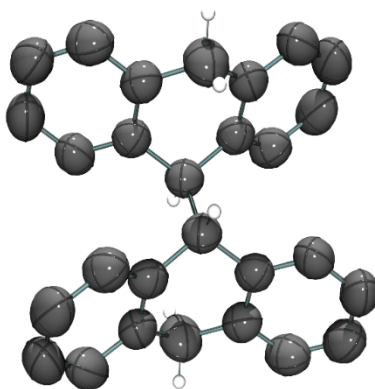

**Figure S14.** Crystal structure of **1** (50 % ellipsoids). All hydrogen atoms are omitted for clarity other than hydrogen on  $sp^3$  carbon. Color scheme: gray = C, white = H, and red = O. Crystal parameters matched those reported elsewhere.<sup>3,4</sup>

**Crystal structure of compound 2 (bianthronyl)**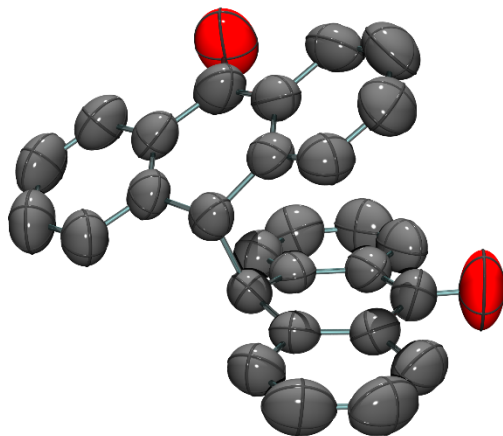

**Figure S15.** Crystal structure of **2** (50 % ellipsoids). All hydrogen atoms are omitted for clarity. Color scheme: gray = C and red = O. Crystal parameters matched those reported elsewhere.<sup>5</sup>

**Crystal structure of compound 3 (anthraquinone)**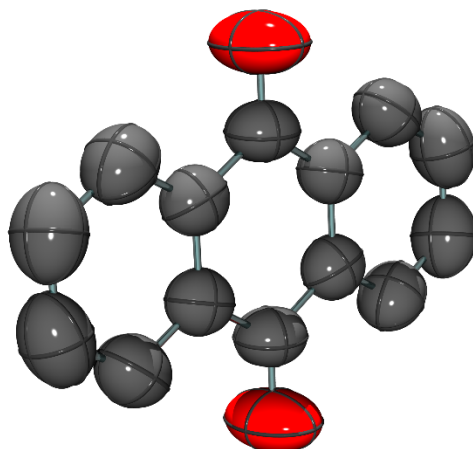

**Figure S16.** Crystal structure of **3** (50 % ellipsoids). All hydrogen atoms are omitted for clarity. Color scheme: gray = C and red = O. Crystal parameters matched those reported elsewhere.<sup>6</sup>

**<sup>1</sup>H NMR spectra for the reaction of toluene with V<sup>V</sup>(O)(O) under air and N<sub>2</sub>**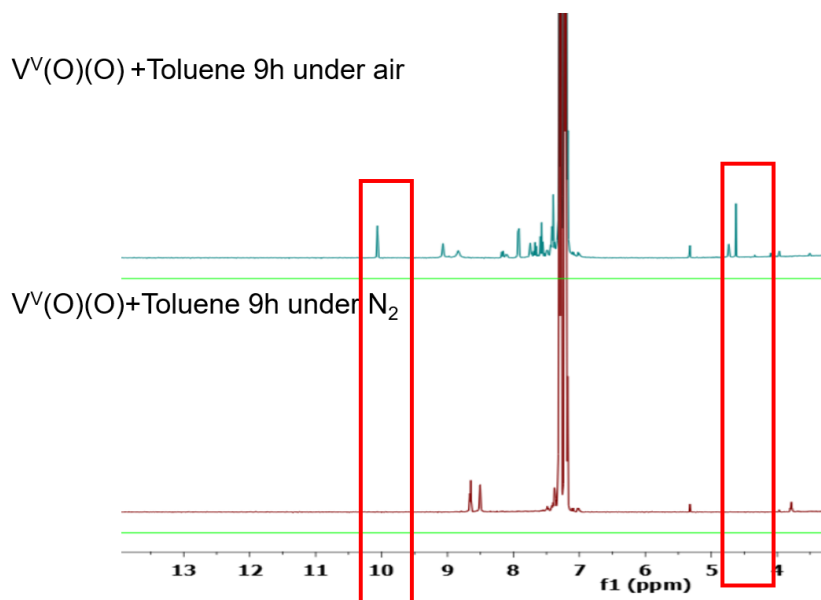

**Figure S17.** <sup>1</sup>H NMR spectra for reaction with toluene in CD<sub>3</sub>CN under air (top) and N<sub>2</sub> (bottom) (540 min irradiation for both cases).

**$^1\text{H}$  NMR spectra for reaction of DHA with  $\text{V}^{\text{V}}(\text{O})(\text{O})$  under air and  $\text{N}_2$** 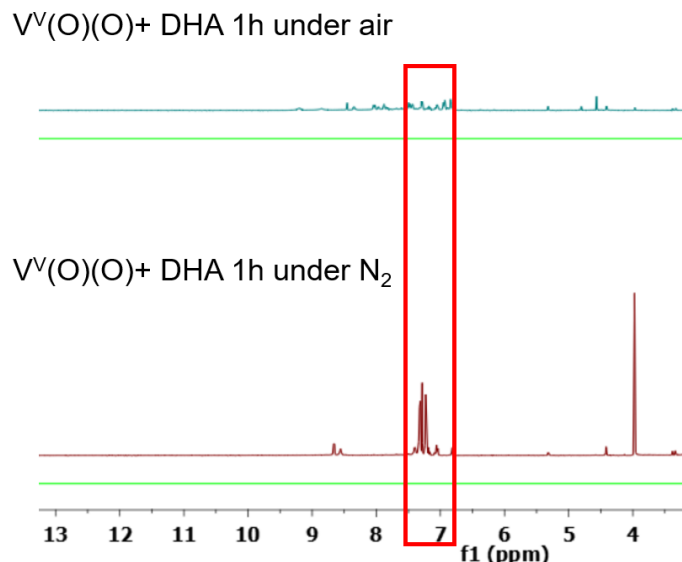

**Figure S18.**  $^1\text{H}$  NMR spectra for reaction with DHA in  $\text{CD}_3\text{CN}$  under air (top) and  $\text{N}_2$  (bottom) (60 min irradiation for both cases).

**Comparison of photochemical oxidations using different ratios of V-complexes and DHA under  $\text{N}_2$  and  $\text{O}_2$** 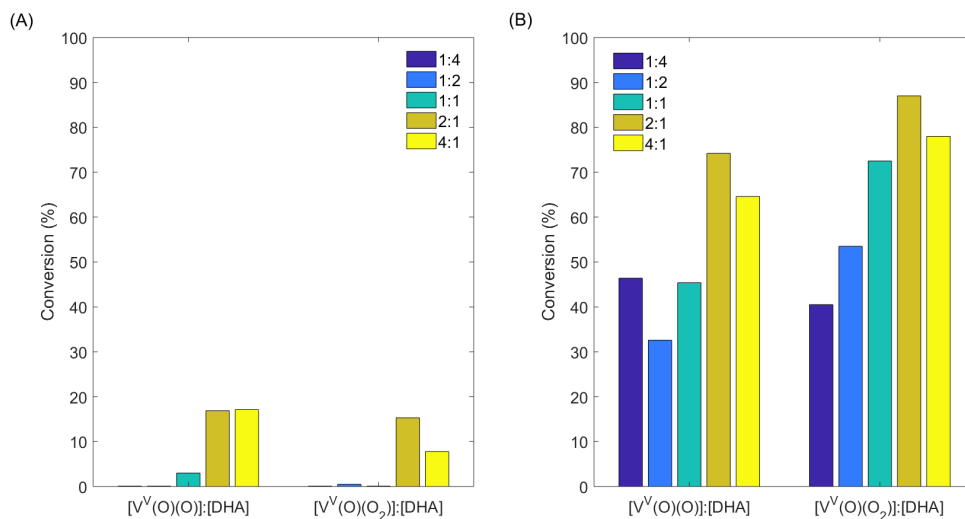**Figure**

**S19.** The conversion versus different ratios of  $\text{V}(\text{O})(\text{O})^t\text{Bu}/\text{V}(\text{O})(\text{O}_2)^t\text{Bu}$  and DHA under  $\text{N}_2$  (A) and air (B). In all cases, irradiation time was 60 min. *Note: Figures S19-S28 involve reactions of vanadium complexes in the absence of substrate. All reaction times were 60 minutes.*

**$^{51}\text{V}$  NMR spectra for  $\text{V}^{\text{V}}(\text{O})(\text{O})$  before and after irradiation under  $\text{O}_2$ , air and  $\text{N}_2$** 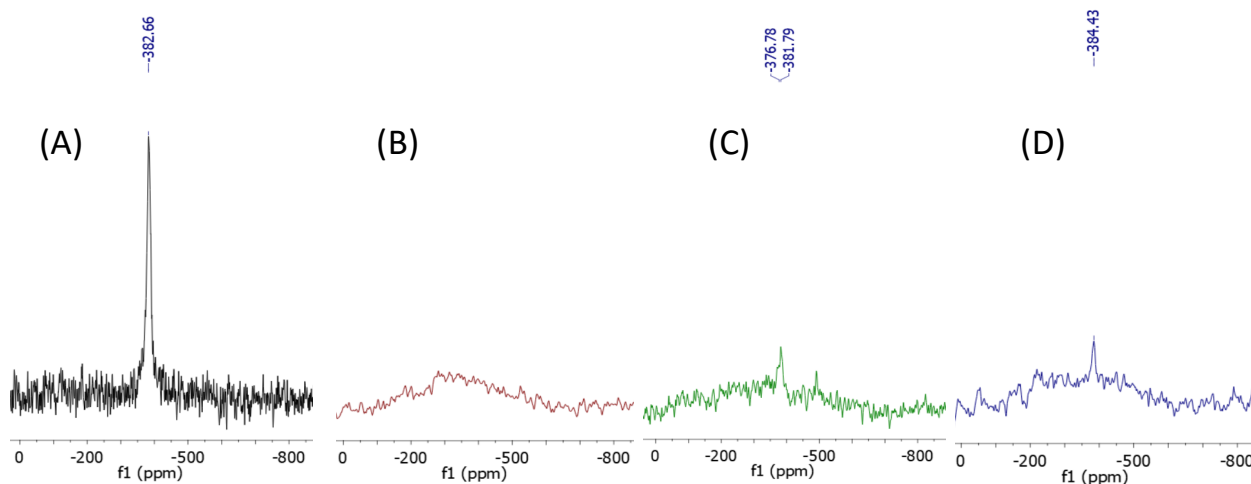

**Figure S20.**  $^{51}\text{V}$  NMR spectra for  $\text{V}^{\text{V}}(\text{O})(\text{O})$  in  $\text{CD}_3\text{CN}$ . (A) Before photochemical reaction; (B) Under air after reaction; (C) Under  $\text{O}_2$  after reaction; (D) Under  $\text{N}_2$  after reaction.

 **$^{51}\text{V}$  NMR spectra for  $\text{V}^{\text{V}}(\text{O})(\text{O}_2)$  before and after photochemical reaction under  $\text{O}_2$ , air and  $\text{N}_2$** 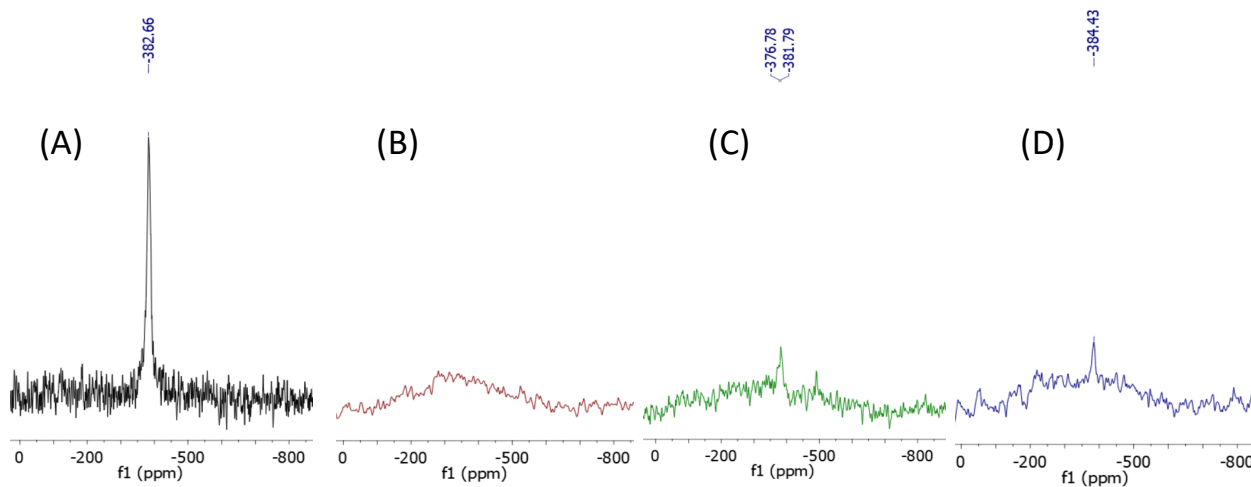

**Figure S21.**  $^{51}\text{V}$  NMR spectra for  $\text{V}^{\text{V}}(\text{O})(\text{O}_2)$  in  $\text{CD}_3\text{CN}$ . (A) Before photochemical reaction; (B) Under air after reaction; (C) Under  $\text{O}_2$  after reaction; (D) Under  $\text{N}_2$  after reaction.

**$^1\text{H}$  NMR spectra for  $\text{V}^{\text{V}}(\text{O})(\text{O})$  before and after photochemical reaction under  $\text{O}_2$ , air and  $\text{N}_2$** 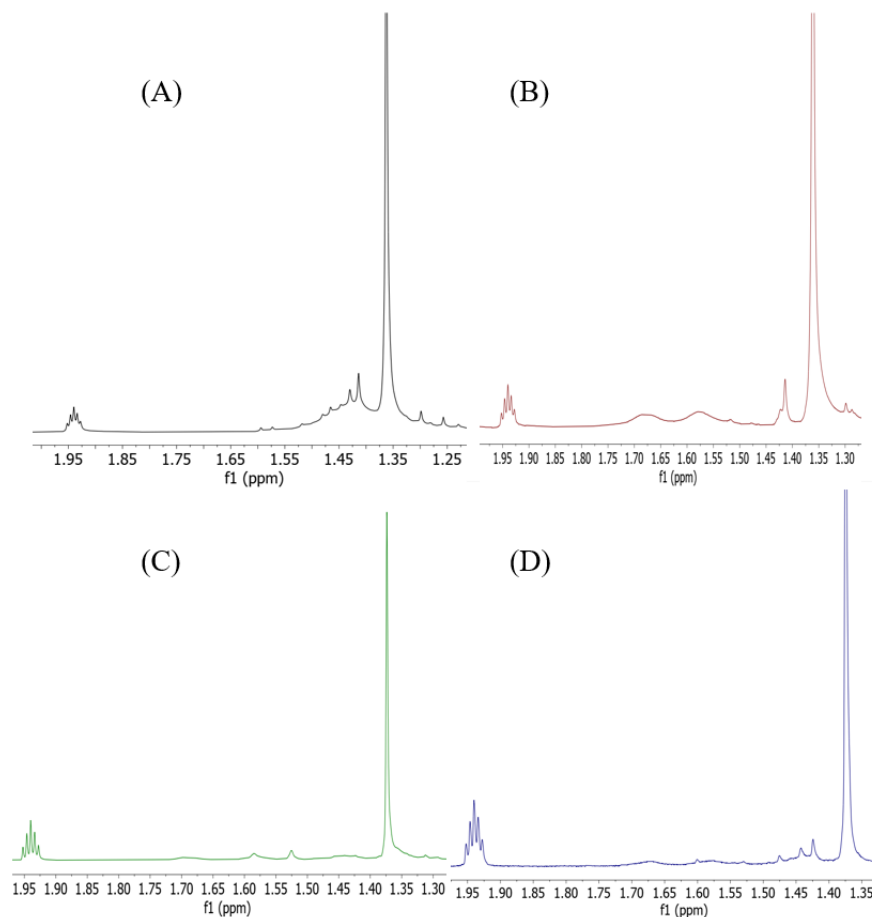

**Figure S22.**  $^1\text{H}$  NMR spectra for  $\text{V}^{\text{V}}(\text{O})(\text{O})$  in  $\text{CD}_3\text{CN}$ . (A) Before photochemical reaction; (B) Under air after reaction; (C) Under  $\text{O}_2$  after reaction; (D) Under  $\text{N}_2$  after reaction.

**$^1\text{H}$  NMR spectra for  $\text{V}^{\text{V}}(\text{O})(\text{O}_2)$  before and after photochemical reaction under  $\text{O}_2$ , air and  $\text{N}_2$** 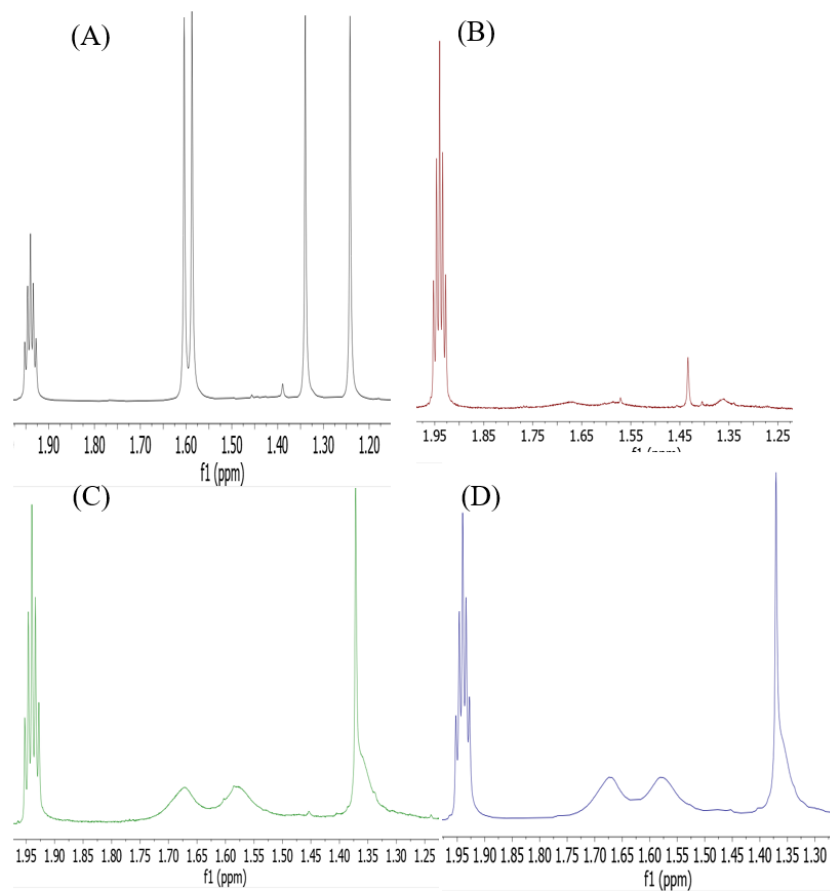

**Figure S23.**  $^1\text{H}$  NMR spectra for  $\text{V}^{\text{V}}(\text{O})(\text{O}_2)$  in  $\text{CD}_3\text{CN}$ . (A) Before photochemical reaction; (B) Under air after reaction; (C) Under  $\text{O}_2$  after reaction; (D) Under  $\text{N}_2$  after reaction.

**IR spectra for  $V^{IV}(O)(OH)$ ,  $V^V(O)(O)$  and  $V^V(O)(O_2)$** 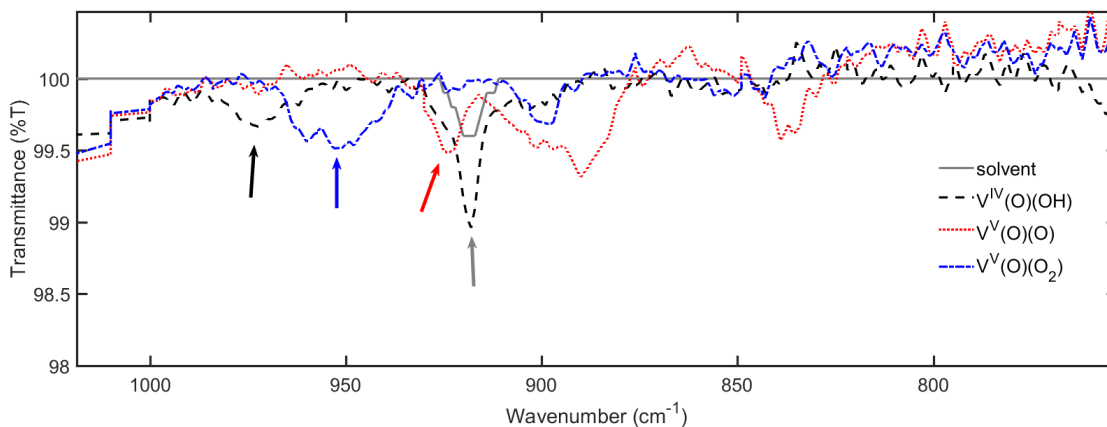

**Figure S24.** IR spectra for  $V^{IV}(O)(OH)$ ,  $V^V(O)(O)$  and  $V^V(O)(O_2)$  in  $CH_3CN$ . The V – O stretch for  $V^{IV}(O)(OH)$ ,  $V^V(O)(O)$  and  $V^V(O)(O_2)$  were about 969, 925 and 950  $cm^{-1}$ , respectively.

**IR spectra for  $V^V(O)(O)$  before and after photochemical reaction under  $O_2$ , air and  $N_2$** 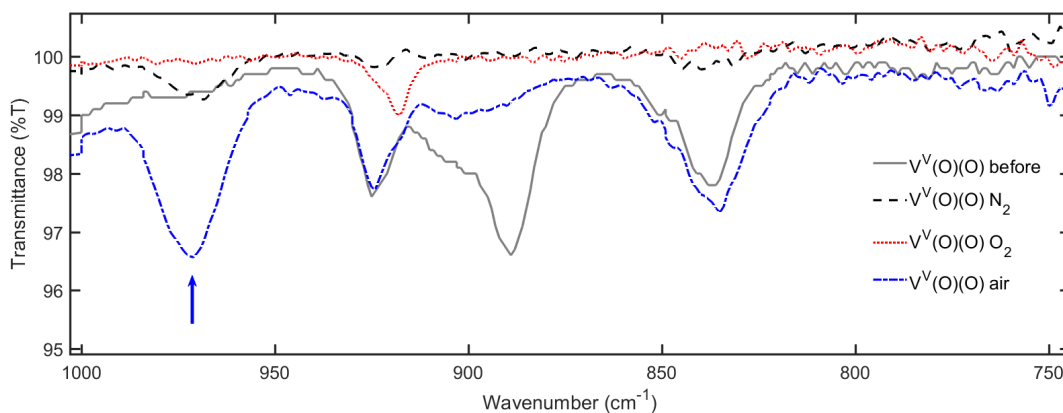

**Figure S25.** IR spectra for  $V^V(O)(O)$  before and after photochemical reaction under  $O_2$ , air and  $N_2$  in  $CH_3CN$ .



**IR spectra for  $V^V(O)(O_2)$  before and after photochemical reaction under  $O_2$ , air and  $N_2$** 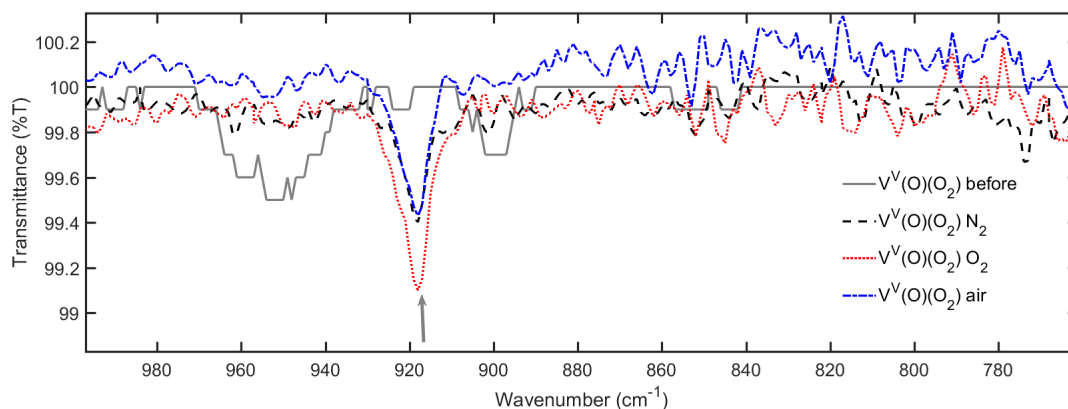

**Figure S26.** IR spectra for  $V^V(O)(O_2)$  before and after photochemical reaction under  $O_2$ , air and  $N_2$  in  $CH_3CN$ .

**UV-vis spectra for  $V^{IV}(O)(OH)$ ,  $V^V(O)(O)$  and  $V^V(O)(O_2)$** 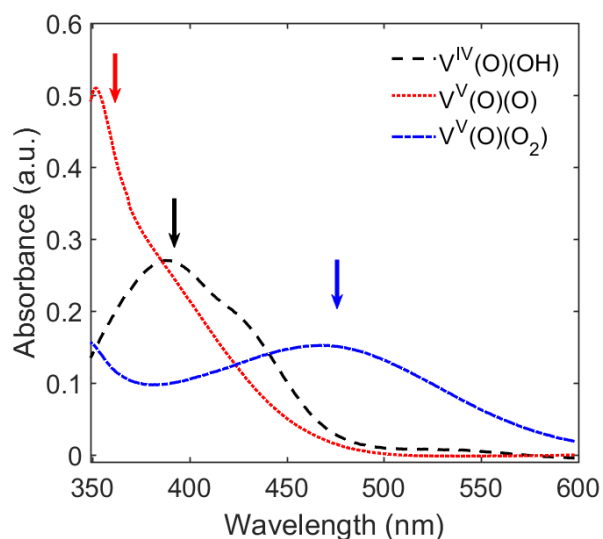

**Figure S27.** UV-vis spectra for  $V^{IV}(O)(OH)$ ,  $V^V(O)(O)$  and  $V^V(O)(O_2)$  in  $CH_3CN$ . The absorption for  $V^{IV}(O)(OH)$ ,  $V^V(O)(O)$  and  $V^V(O)(O_2)$  were about 390, 360 and 475 nm, respectively.

**UV-vis spectra for  $V^V(O)(O)$  before and after photochemical reaction under  $O_2$ , air and  $N_2$** 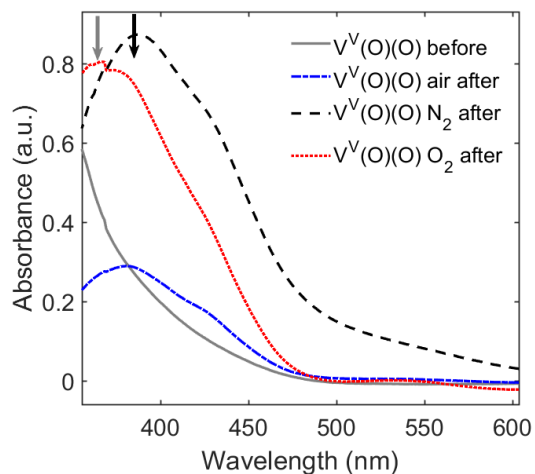

**Figure S28.** UV-vis spectra for  $V^V(O)(O)$  before and after photochemical reaction under  $O_2$ , air and  $N_2$  in  $CH_3CN$ .

**UV-vis spectra for  $V^V(O)(O_2)$  before and after photochemical reaction under  $O_2$ , air and  $N_2$** 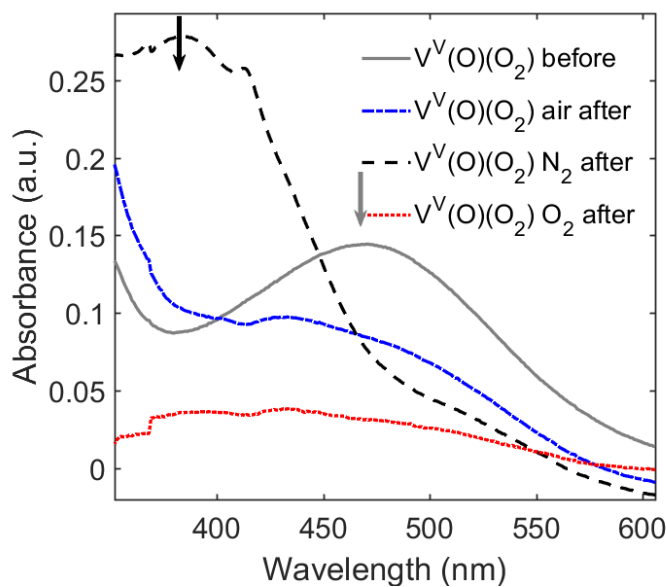

**Figure S29.** UV-vis spectra for  $V^V(O)(O_2)$  before and after photochemical reaction under  $O_2$ , air and  $N_2$  in  $CH_3CN$ .

## Computational Details

Calculations were performed using the ORCA 4.2.1 *ab initio* quantum chemistry program.<sup>7,8</sup> Geometry optimizations and single point calculations were carried out using the TPSSh functional, utilizing the RIJCOSX algorithm.<sup>9</sup> The basis set was def2-TZVP(-f)/def2/J<sup>10–12</sup> and the Becke-Johnson damping scheme<sup>13,14</sup> on all atoms. The optimized structure were characterized using vibrational frequency calculations at the same level of theory to confirm that the structures were located at a minimum on the potential energy surface. Metrical parameters calculated for cis-V(O)(O)(4,4'-dimethylbipyridyl)<sup>+</sup> are similar to those in an experimental X-ray structure.<sup>1</sup> TD-DT For direct comparison with TD-DFT calculations, single-point energy calculations used the TPSS<sup>15</sup> functional and def2-TZVP(-f) def2-TZVP/C basis set<sup>10–12</sup> in acetonitrile solvent using the a dielectric continuum model (CPCM).<sup>16</sup>

## Coordinates for the optimized geometry of cis-V(O)(O)(4,4'-dimethylbipyridyl)<sup>+</sup>

|   |                  |                   |                   |
|---|------------------|-------------------|-------------------|
| V | 6.11941896773942 | -0.45497842799425 | 3.17792006162757  |
| O | 7.42171822791517 | 0.23419708693504  | 3.86243064469444  |
| O | 6.65719097869000 | -1.33642884485130 | 1.92568235155056  |
| N | 4.90224421813376 | 0.20495097743733  | 5.00593609921729  |
| N | 5.86680993267706 | -2.15956357626153 | 4.41219124184775  |
| N | 5.59842040115707 | 1.28724768358628  | 2.09684091518601  |
| N | 3.94659965808749 | -0.71658254645268 | 2.45953161097691  |
| C | 4.45331742695137 | 1.44126138659987  | 5.24301677471115  |
| H | 4.55686894493672 | 2.15638250989757  | 4.43685147531889  |
| C | 3.88177309989034 | 1.81700556961199  | 6.45017516511002  |
| H | 3.53235847962820 | 2.83382548579273  | 6.57910038850640  |
| C | 3.76555004642875 | 0.88260017728372  | 7.47868161441956  |
| C | 3.17191589502349 | 1.23169622560776  | 8.81227298886765  |
| C | 4.23524915805885 | -0.40633581426814 | 7.22273530428836  |
| H | 4.16410983024288 | -1.16372569386770 | 7.99205479390295  |
| C | 4.79373627190739 | -0.71246390423155 | 5.98763644167676  |
| C | 5.30848029449492 | -2.04854263543925 | 5.64286968173848  |
| C | 5.22302256403763 | -3.14193344774523 | 6.49295071223675  |
| H | 4.76732605086169 | -3.02885337046565 | 7.46749181117825  |
| C | 5.71069817625889 | -4.38915485856112 | 6.09913448395671  |
| C | 5.63818005727617 | -5.57167189933142 | 7.01733407871840  |
| C | 6.26840371438234 | -4.48106495991579 | 4.82411739003691  |
| H | 6.65625235425533 | -5.42017760211314 | 4.45051916537879  |
| C | 6.33099818220032 | -3.35797662742191 | 4.01934778166465  |
| H | 6.75786610467339 | -3.39417972947902 | 3.02665613159933  |
| C | 6.50832691900401 | 2.26516780156075  | 1.93586676410267  |
| H | 7.40346949084912 | 2.17671399377596  | 2.53529399130056  |
| C | 6.32298626480415 | 3.31382859135832  | 1.05688718228515  |
| H | 7.09219703746401 | 4.07043477005487  | 0.96823643051088  |
| C | 5.15654928616686 | 3.37762011981659  | 0.29066339086914  |
| C | 4.94565516708622 | 4.46753963124754  | -0.71530720005892 |
| C | 4.20979895419081 | 2.37326547693818  | 0.48471605219002  |
| H | 3.28769584917825 | 2.39084285286609  | -0.08011213049193 |
| C | 4.44673079857131 | 1.34428309425520  | 1.38820613786388  |
| C | 3.49165760480615 | 0.25239442965249  | 1.64241305705319  |
| C | 2.21071685355333 | 0.21729914403950  | 1.09656135295604  |
| H | 1.87227101327832 | 1.01493385530226  | 0.44890095863973  |
| C | 1.35098681052311 | -0.83783910057734 | 1.39387454612903  |

|   |                   |                   |                   |
|---|-------------------|-------------------|-------------------|
| C | -0.04047505532337 | -0.90127360638836 | 0.83569190376245  |
| C | 1.84206559650787  | -1.83784362811795 | 2.23695964165054  |
| H | 1.22988066516078  | -2.68838466149653 | 2.51083784221371  |
| C | 3.12980964585105  | -1.74097343613457 | 2.73661384486284  |
| H | 3.52296814893012  | -2.51187841187625 | 3.38557366452571  |
| H | 2.73493196267835  | 2.23009194271820  | 8.80176900979656  |
| H | 3.94508268008313  | 1.19678393794816  | 9.58507099940136  |
| H | 2.40175192396629  | 0.50890977548609  | 9.09012220136003  |
| H | 5.94782491806296  | -6.48434213621923 | 6.50935774886174  |
| H | 4.62293374777036  | -5.69930508354470 | 7.40025593584026  |
| H | 6.29195709798322  | -5.41170489880348 | 7.87949093445543  |
| H | -0.26412944995417 | -0.02555203344425 | 0.22687575219766  |
| H | -0.77061178649273 | -0.96437134836633 | 1.64667260558404  |
| H | -0.16132063317417 | -1.79695038277863 | 0.22053597448694  |
| H | 3.89792628828449  | 4.54438512279118  | -1.00576822757744 |
| H | 5.53394736760948  | 4.25100272709856  | -1.61275052690357 |
| H | 5.28709579667204  | 5.42659829648508  | -0.32209894627820 |

**Positions of the 25 lowest energy transitions for *cis*-V(O)(O)(4,4'-dimethylbipyridyl)<sup>+</sup>**

| State | Energy<br>(cm <sup>-1</sup> ) | Wavelength<br>(nm) | fosc        | P2<br>(au**2) | PX<br>(au) | PY<br>(au) | PZ<br>(au) |
|-------|-------------------------------|--------------------|-------------|---------------|------------|------------|------------|
| 1     | 19525.8                       | 512.1              | 0.004701750 | 0.07927       | -0.08012   | 0.17069    | -0.20910   |
| 2     | 20625.0                       | 484.8              | 0.003301317 | 0.05269       | -0.17988   | -0.03603   | 0.13799    |
| 3     | 25287.2                       | 395.5              | 0.000291920 | 0.00380       | -0.02163   | -0.02164   | 0.05352    |
| 4     | 26332.6                       | 379.8              | 0.000981599 | 0.01227       | -0.09759   | 0.04195    | -0.03143   |
| 5     | 26729.3                       | 374.1              | 0.002189815 | 0.02697       | -0.11418   | 0.00941    | 0.11767    |
| 6     | 28220.0                       | 354.4              | 0.002184316 | 0.02548       | -0.05093   | 0.14499    | -0.04321   |
| 7     | 28459.5                       | 351.4              | 0.000517156 | 0.00598       | 0.00659    | 0.00759    | 0.07669    |
| 8     | 28588.4                       | 349.8              | 0.002848295 | 0.03280       | -0.07702   | -0.14139   | 0.08292    |
| 9     | 29340.5                       | 340.8              | 0.000489106 | 0.00549       | -0.00819   | -0.03346   | 0.06558    |
| 10    | 29861.2                       | 334.9              | 0.000536629 | 0.00592       | -0.06927   | 0.00719    | 0.03266    |
| 11    | 30249.3                       | 330.6              | 0.003523602 | 0.03835       | -0.03512   | 0.13285    | -0.13952   |
| 12    | 30807.1                       | 324.6              | 0.047476397 | 0.50734       | 0.15695    | -0.37109   | 0.58737    |
| 13    | 31333.1                       | 319.2              | 0.001524425 | 0.01602       | -0.00265   | -0.10897   | 0.06430    |
| 14    | 31502.9                       | 317.4              | 0.001837386 | 0.01920       | -0.04504   | 0.08939    | -0.09583   |
| 15    | 31938.4                       | 313.1              | 0.002203794 | 0.02272       | 0.06619    | 0.12029    | 0.06217    |
| 16    | 32448.4                       | 308.2              | 0.113834510 | 1.15493       | -0.92003   | -0.52043   | 0.19397    |
| 17    | 32558.3                       | 307.1              | 0.074583895 | 0.75415       | -0.20047   | 0.77142    | 0.34479    |
| 18    | 32699.4                       | 305.8              | 0.044332078 | 0.44633       | -0.05807   | 0.64027    | 0.18170    |
| 19    | 33679.5                       | 296.9              | 0.025790035 | 0.25209       | 0.32184    | -0.29485   | 0.24815    |
| 20    | 33998.7                       | 294.1              | 0.012935776 | 0.12526       | 0.13213    | 0.09858    | -0.31318   |
| 21    | 34043.2                       | 293.7              | 0.009771047 | 0.09449       | -0.24317   | -0.18742   | -0.01527   |
| 22    | 34118.1                       | 293.1              | 0.021674506 | 0.20914       | 0.11466    | 0.08637    | -0.43421   |
| 23    | 34587.9                       | 289.1              | 0.020394524 | 0.19412       | -0.20396   | 0.35140    | 0.17040    |
| 24    | 34736.1                       | 287.9              | 0.004407933 | 0.04178       | 0.19852    | 0.00719    | 0.04810    |
| 25    | 35221.4                       | 283.9              | 0.001709609 | 0.01598       | 0.11510    | -0.05221   | 0.00238    |

## References

- (1) Waidmann, C. R.; Zhou, X.; Tsai, E. A.; Kaminsky, W.; Hrovat, D. A.; Borden, W. T.; Mayer, J. M. Slow Hydrogen Atom Transfer Reactions of Oxo- and Hydroxo-Vanadium Compounds: The Importance of Intrinsic Barriers. *J. Am. Chem. Soc.* **2009**, *131*, 4729–4743. <https://doi.org/doi:10.1021/ja808698x>.
- (2) Waidmann, C. R.; DiPasquale, A. G.; Mayer, J. M. Synthesis and Reactivity of Oxo-Peroxy-Vanadium(V) Bipyridine Compounds. *Inorg. Chem.* **2010**, *49* (5), 2383–2391. <https://doi.org/10.1021/ic9022618>.
- (3) Li, P.-C.; Wang, T.-S.; Lee, G.-H.; Liu, Y.-H.; Wang, Y.; Chen, C.-T.; Chao, I. Theoretical Study and X-Ray Determination of Bianthrone: Long C–C Bond Length and Preferred Gauche Conformation. *J. Org. Chem.* **2002**, *67* (23), 8002–8009. <https://doi.org/10.1021/jo020196g>.
- (4) Li, P.-C.; Wang, T.-S.; Lee, G.-H.; Liu, Y.-H.; Wang, Y.; Chen, C.-T.; Chao, I. Theoretical Study and X-Ray Determination of Bianthrone: Long C–C Bond Length and Preferred Gauche Conformation. *J. Org. Chem.* **2003**, *68* (6), 2528–2528. <https://doi.org/10.1021/jo0399246>.
- (5) Wen, Z.-G.; Li, J.-M. Redetermination of 9,9'-Bianthracene-10,10'(9H,9'H)-Dione. *Acta Cryst E* **2008**, *64* (10), o1931–o1931. <https://doi.org/10.1107/S1600536808028833>.
- (6) Lonsdale, K.; Milledge, J.; El Sayed, K. The Crystal Structure (at Five Temperatures) and Anisotropic Thermal Expansion of Anthraquinone. *Acta Cryst* **1966**, *20* (1), 1–13. <https://doi.org/10.1107/S0365110X6600001X>.
- (7) Neese, F. The ORCA Program System. *WIREs: Comput. Mol. Sci.* **2012**, *2*, 73–78.
- (8) Neese, F. Software Update: The ORCA Program System, Version 4.0. *WIREs: Comput. Mol. Sci.* **2018**, *8* (1), e1327. <https://doi.org/10.1002/wcms.1327>.
- (9) Neese, F.; Wennmohs, F.; Hansen, A.; Becker, U. Efficient, Approximate and Parallel Hartree–Fock and Hybrid DFT Calculations. A ‘Chain-of-Spheres’ Algorithm for the Hartree–Fock Exchange. *Chem. Phys.* **2009**, *356* (1), 98–109. <https://doi.org/10.1016/j.chemphys.2008.10.036>.
- (10) Weigend, F. Accurate Coulomb-Fitting Basis Sets for H to Rn. *Phys. Chem. Chem. Phys.* **2006**, *8* (9), 1057–1065. <https://doi.org/10.1039/B515623H>.
- (11) Weigend, F.; Ahlrichs, R. Balanced Basis Sets of Split Valence, Triple Zeta Valence and Quadruple Zeta Valence Quality for H to Rn: Design and Assessment of Accuracy. *Phys. Chem. Chem. Phys.* **2005**, *7* (18), 3297–3305. <https://doi.org/10.1039/B508541A>.
- (12) Hellweg, A.; Hättig, C.; Höfener, S.; Klopper, W. Optimized Accurate Auxiliary Basis Sets for RI-MP2 and RI-CC2 Calculations for the Atoms Rb to Rn. *Theor Chem Acc* **2007**, *117* (4), 587–597. <https://doi.org/10.1007/s00214-007-0250-5>.
- (13) Grimme, S.; Antony, J.; Ehrlich, S.; Krieg, H. A Consistent and Accurate Ab Initio Parametrization of Density Functional Dispersion Correction (DFT-D) for the 94 Elements H–Pu. *J. Chem. Phys.* **2010**, *132* (15), 154104. <https://doi.org/10.1063/1.3382344>.
- (14) Grimme, S.; Ehrlich, S.; Goerigk, L. Effect of the Damping Function in Dispersion Corrected Density Functional Theory. *J. Comput. Chem.* **2011**, *32* (7), 1456–1465. <https://doi.org/10.1002/jcc.21759>.
- (15) Tao, J.; Perdew, J. P.; Staroverov, V. N.; Scuseria, G. E. Climbing the Density Functional Ladder: Nonempirical Meta-Generalized Gradient Approximation Designed for Molecules and Solids. *Phys. Rev. Lett.* **2003**, *91* (14), 146401. <https://doi.org/10.1103/PhysRevLett.91.146401>.
- (16) Cossi, M.; Rega, N.; Scalmani, G.; Barone, V. Energies, Structures, and Electronic Properties of Molecules in Solution with the C-PCM Solvation Model. *J. Comput. Chem.* **2003**, *24* (6), 669–681. <https://doi.org/10.1002/jcc.10189>.
